# Supplementary material for: A universal ligand mediated method for large scale synthesis of transition metal single atom catalysts
Source: PubMed Central journal article supplement (PMC6783464; doi:10.1038/s41467-019-12510-0), 2019-10-08
Supplement: 41467_2019_12510_MOESM1_ESM.pdf [file 41467_2019_12510_MOESM1_ESM.pdf]

*Supplementary Information*

**A universal ligand mediated method for large scale synthesis  
of transition metal single atom catalysts**

Yang et al.

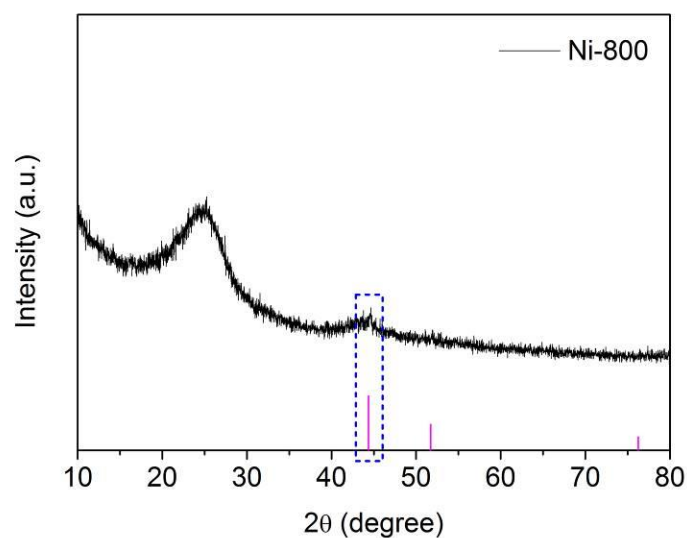

**Supplementary Figure 1 | Characterization of the Ni precursor following pyrolysis at 800 °C. XRD pattern for Ni-800.**

Supplementary Figure 1 confirmed that some Ni clusters were formed when the Ni precursor was pyrolyzed at 800 °C. Clearly at such temperatures, Ni atoms have sufficient mobility to aggregate into small clusters and nanoparticles.

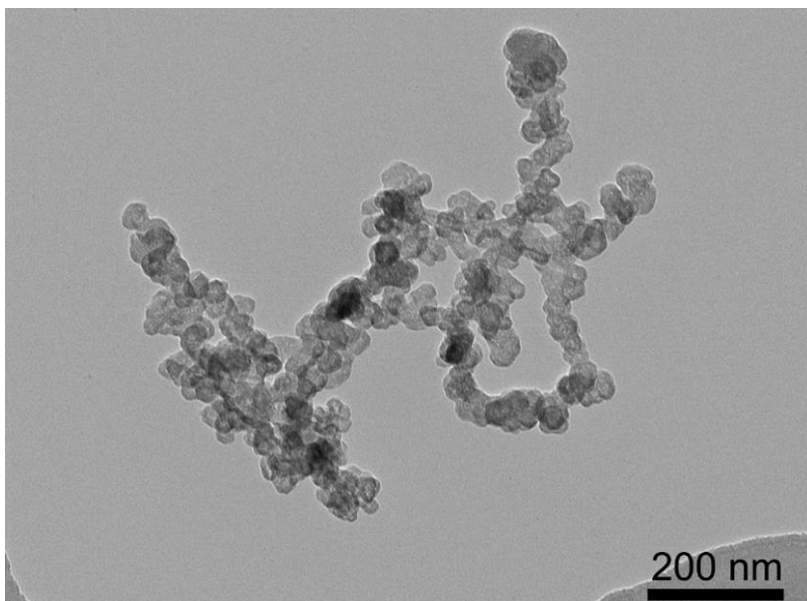

**Supplementary Figure 2 | Morphology of Cr-SAC.** TEM image of Cr-SAC.

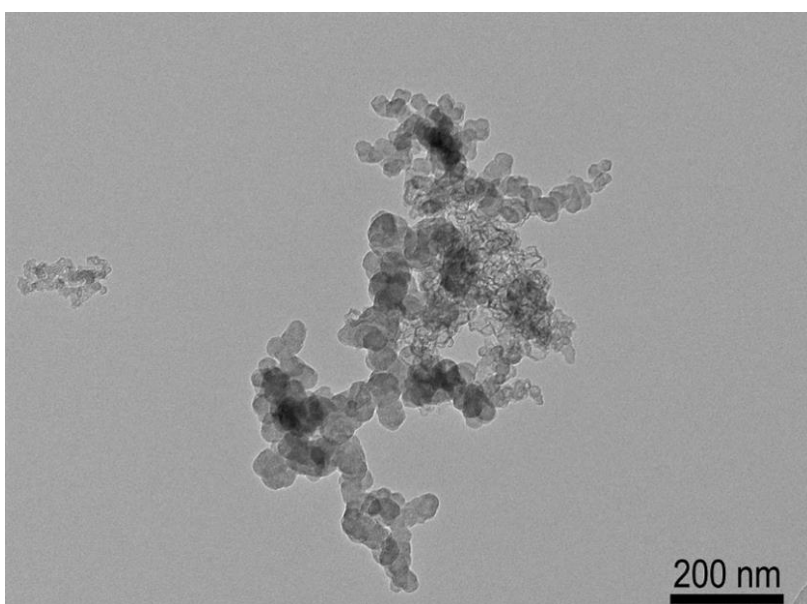

**Supplementary Figure 3 | Morphology of Mn-SAC.** TEM image of Mn-SAC.

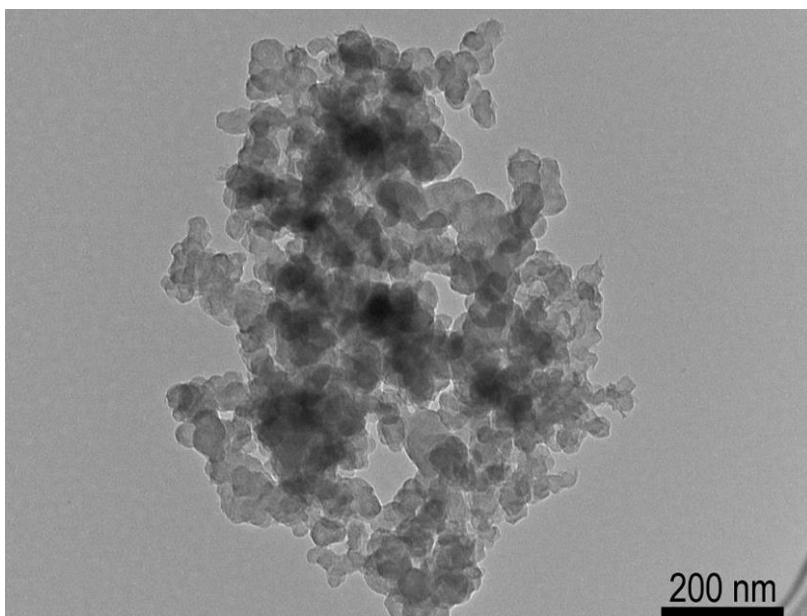

**Supplementary Figure 4 | Morphology of Fe-SAC.** TEM image of Fe-SAC.

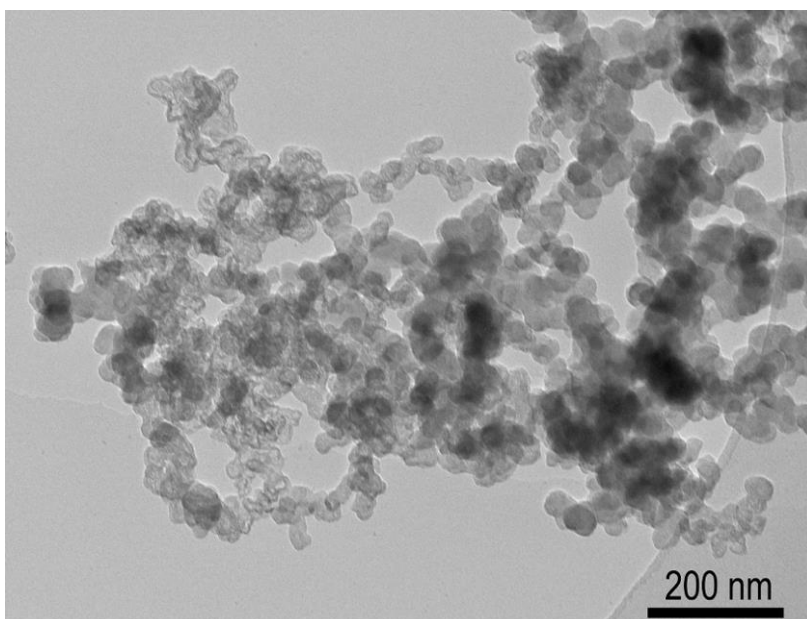

**Supplementary Figure 5 | Morphology of Co-SAC.** TEM image of Co-SAC.

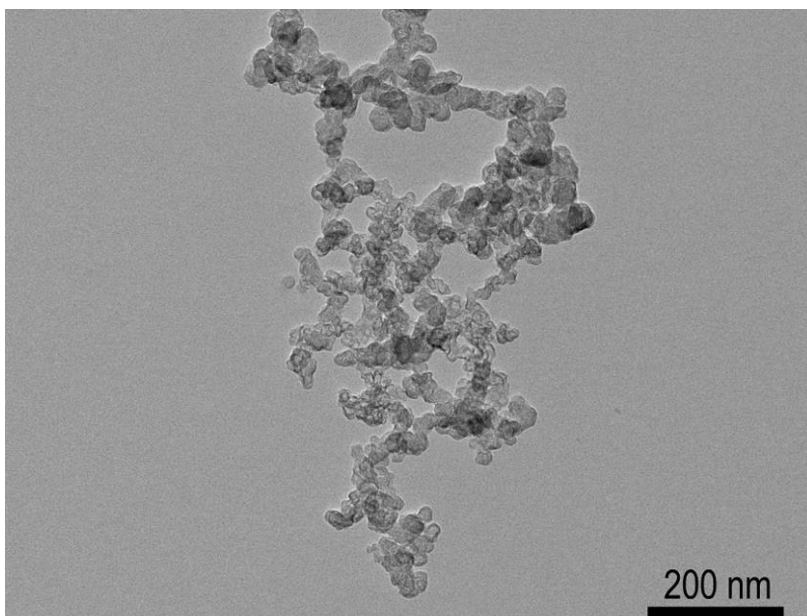

**Supplementary Figure 6 | Morphology of Cu-SAC.** TEM image of Cu-SAC.

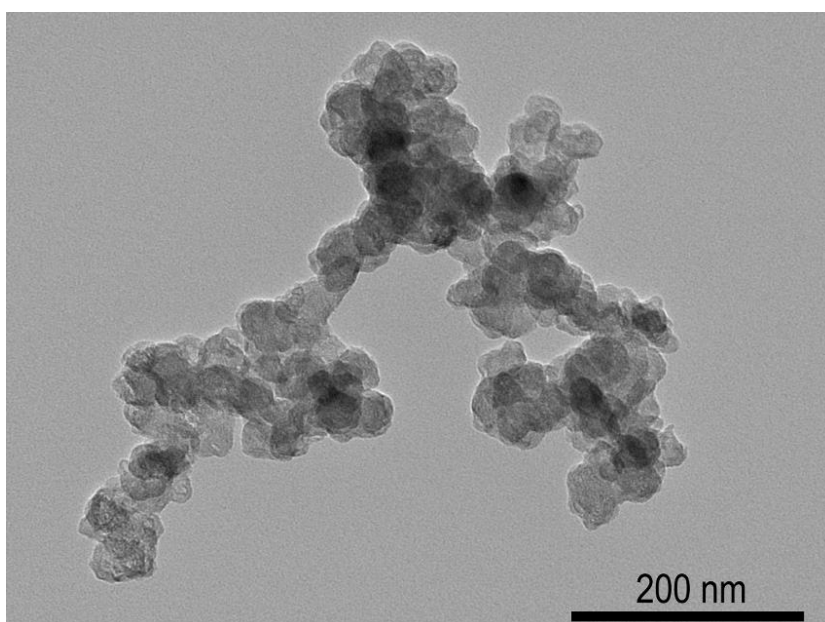

**Supplementary Figure 7 | Morphology of Zn-SAC.** TEM image of Zn-SAC.

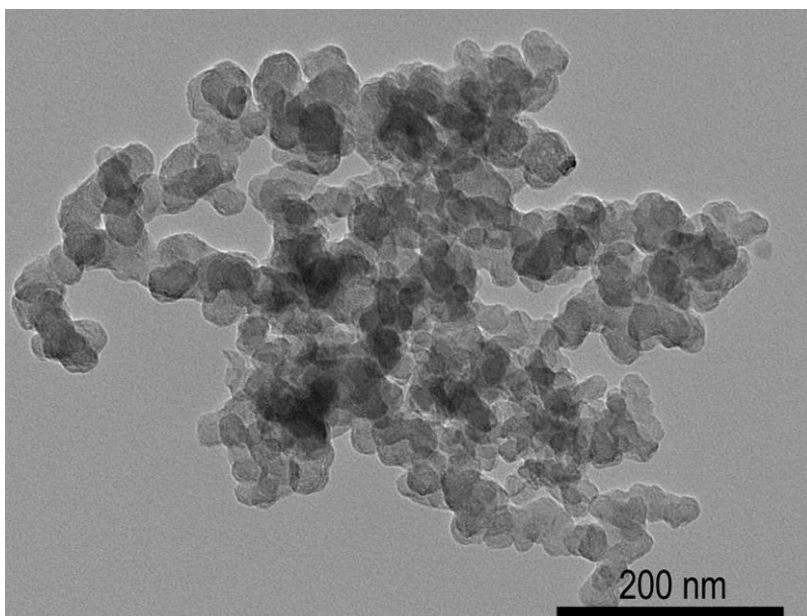

**Supplementary Figure 8 | Morphology of Ru-SAC.** TEM image of Ru-SAC.

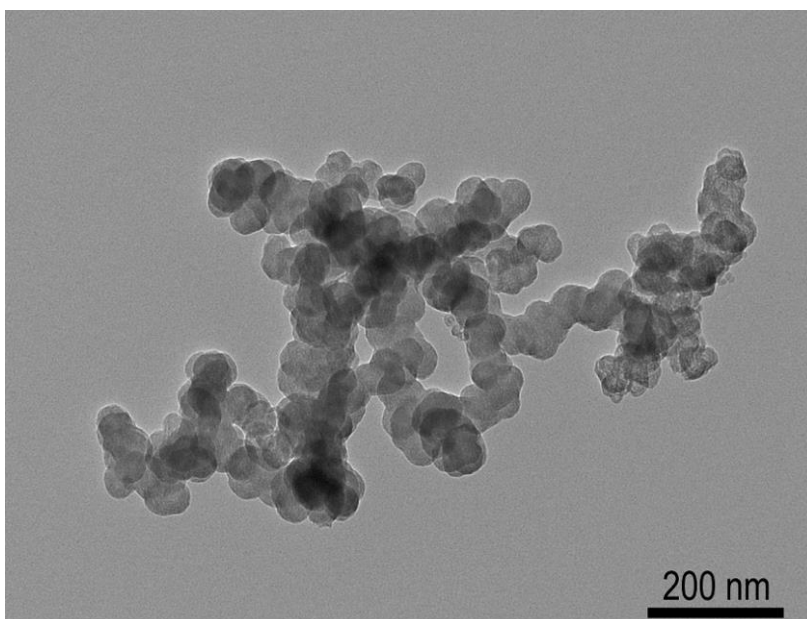

**Supplementary Figure 9 | Morphology of Pt-SAC.** TEM image of Pt-SAC.

Supplementary Figures 2-9 confirm that all M-SACs possessed the structure of carbon black. No metal nanoparticles were observed for any of the M-SACs, indicating that metal atoms in these materials were highly dispersed.

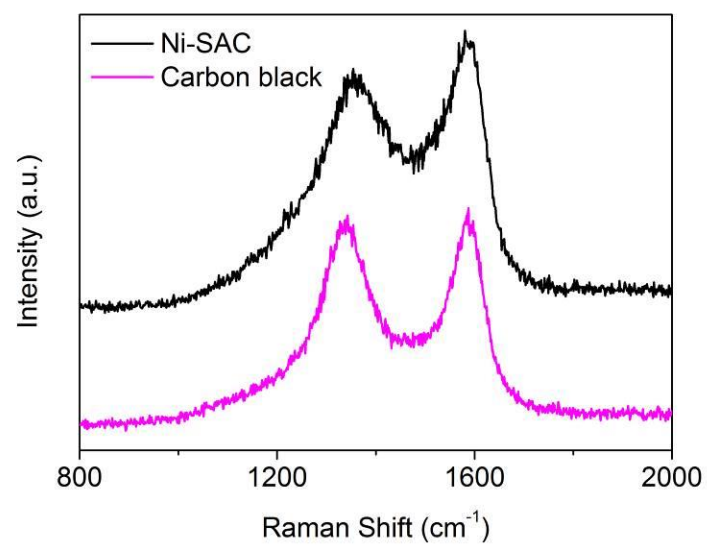

**Supplementary Figure 10 | Characterization of Ni-SAC and carbon black.** Raman spectra for Ni-SAC and carbon black.

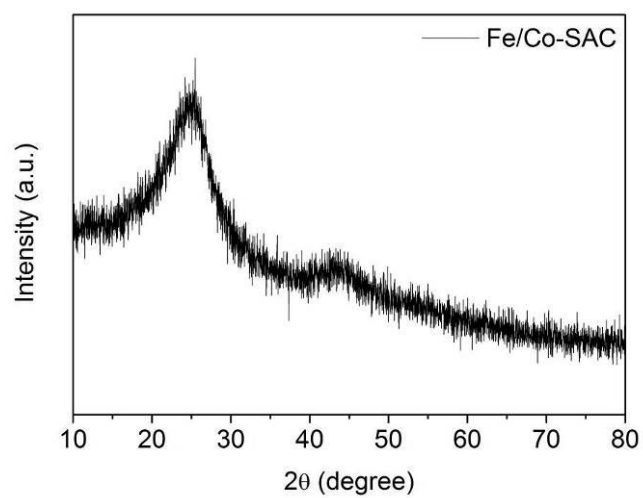

**Supplementary Figure 11 | Characterization of a bimetallic SAC.** XRD pattern for Fe/Co-SAC.



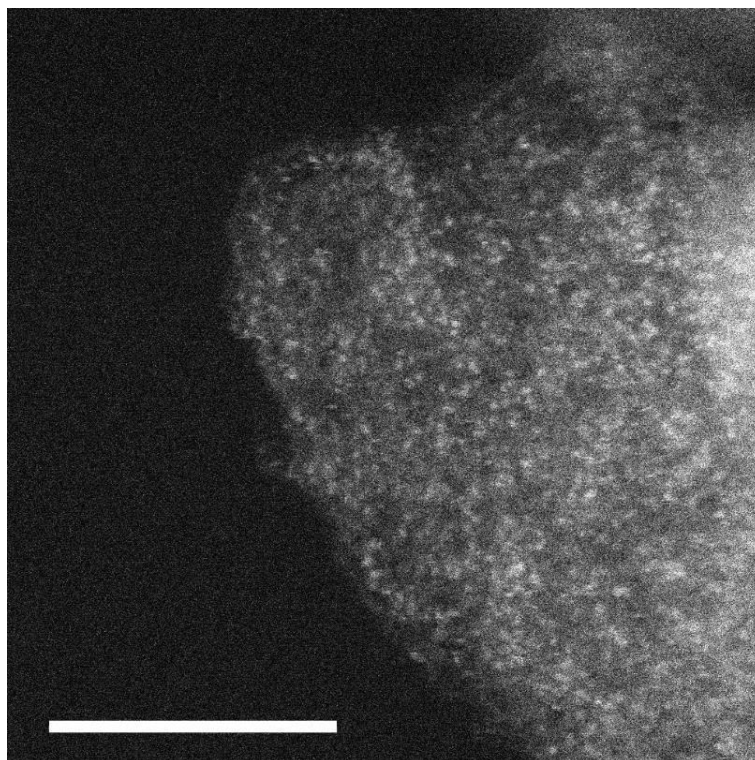

**Supplementary Figure 12 | Morphology of a bimetallic SAC.** HAADF-STEM image for a Fe/Co-SAC, scale bar: 5 nm.

Supplementary Figure 12 confirms that the Fe and Co were atomically dispersed in Fe/Co-SAC.

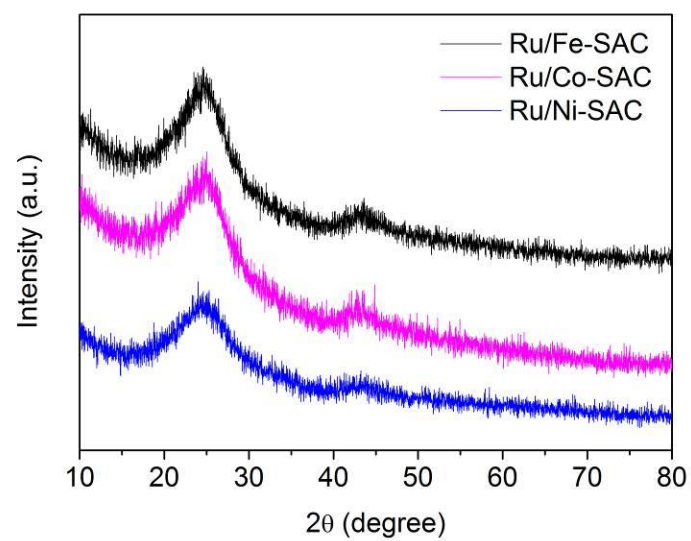

**Supplementary Figure 13 | Characterization of bimetallic SACs.** XRD patterns for Ru/Fe-SAC, Ru/Co-SAC, and Ru/Ni-SAC.

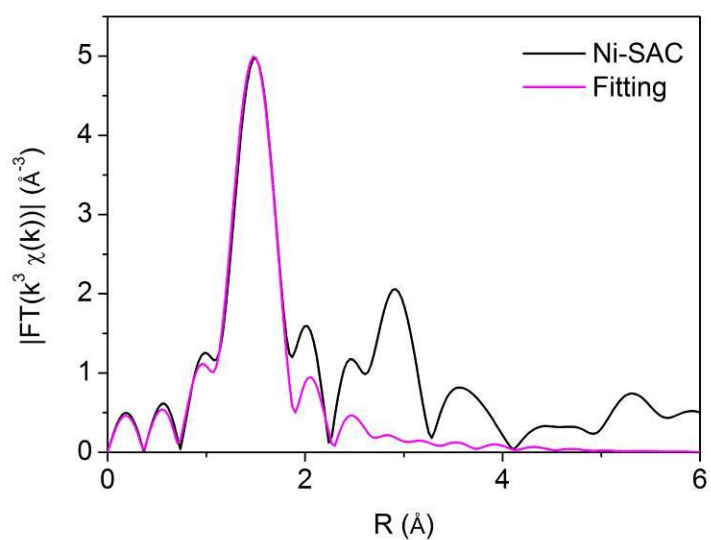

**Supplementary Figure 14 | EXAFS fitting result for Ni-SAC.** Ni K-edge EXAFS (R space plot) for Ni-SAC.

Supplementary Figure 14 confirms that Ni atoms in Ni-SAC were coordinated four fold by N atoms.

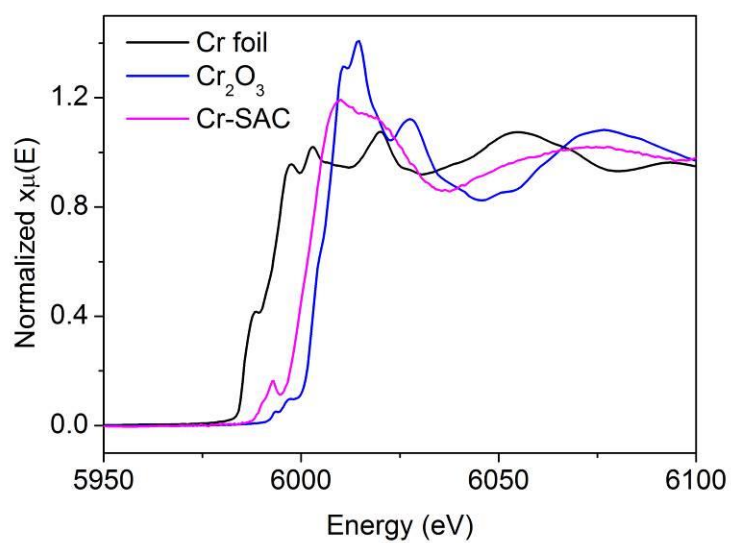

**Supplementary Figure 15 | The oxidation state of Cr in Cr-SAC.** Cr K-edge XANES spectra for Cr-SAC and different chromium reference materials.

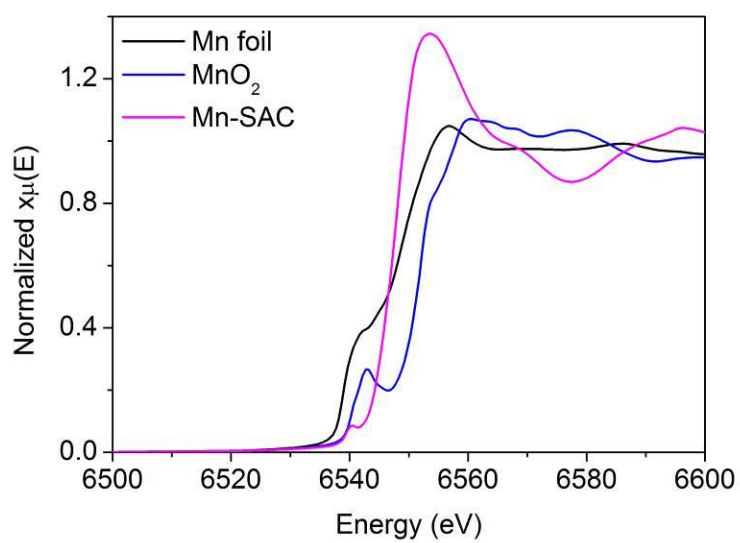

**Supplementary Figure 16 | The oxidation state of Mn in Mn-SAC.** Mn K-edge XANES spectra for Mn-SAC and a manganese foil reference.

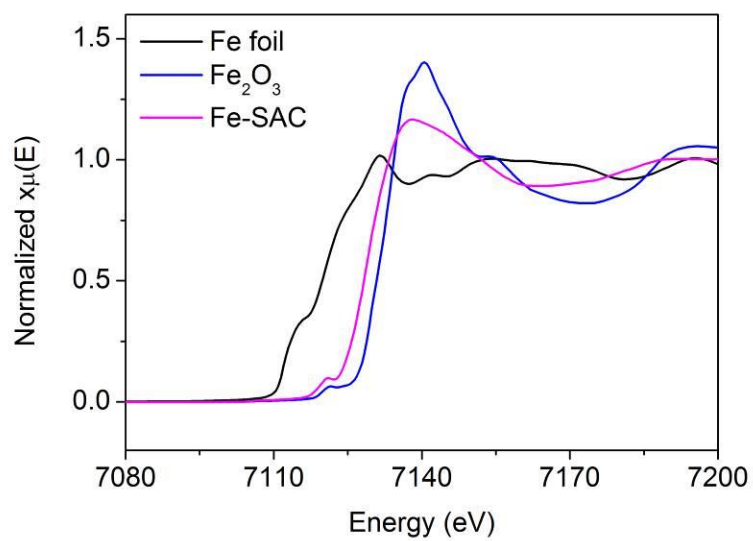

**Supplementary Figure 17 | The oxidation state of Fe in Fe-SAC.** Fe K-edge XANES spectra for Fe-SAC and different iron reference materials.

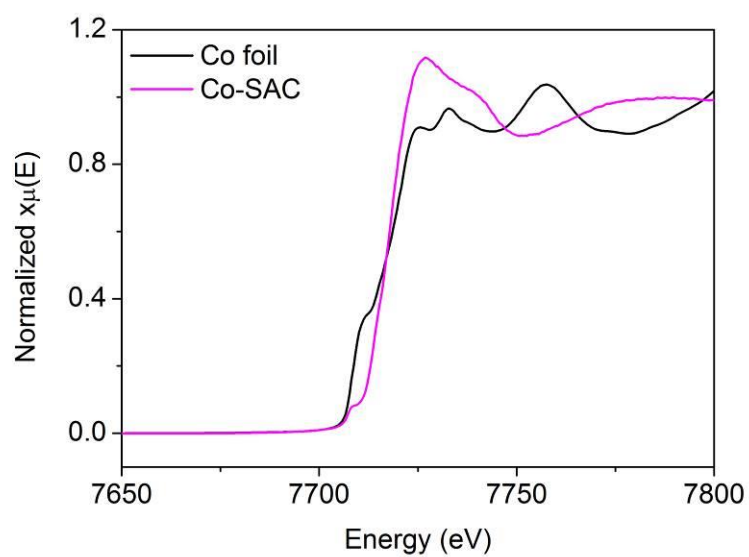

**Supplementary Figure 18 | The oxidation state of Co in Co-SAC.** Co K-edge XANES spectra for Co-SAC and a cobalt foil reference.

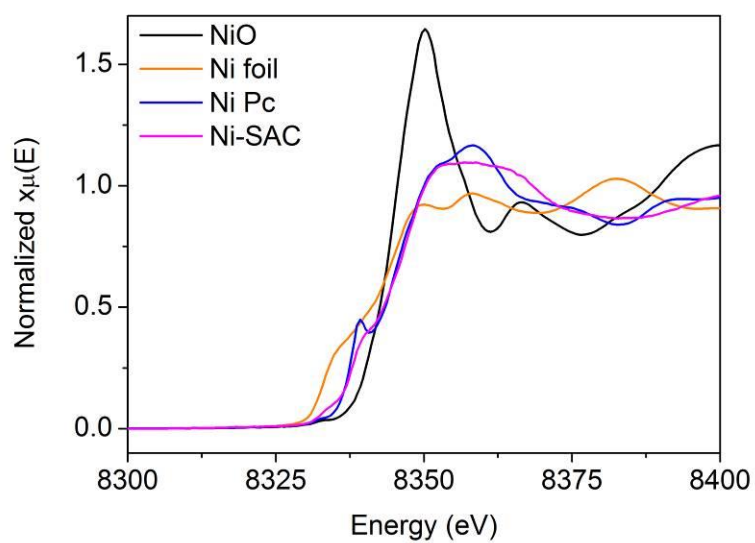

**Supplementary Figure 19 | The oxidation state of Ni in Ni-SAC.** Ni K-edge XANES spectra for Ni-SAC and different nickel reference materials. Ni-SAC was obtained by heating the Ni precursor (Ni Pc) at 600 °C for 2 h under an Ar atmosphere.



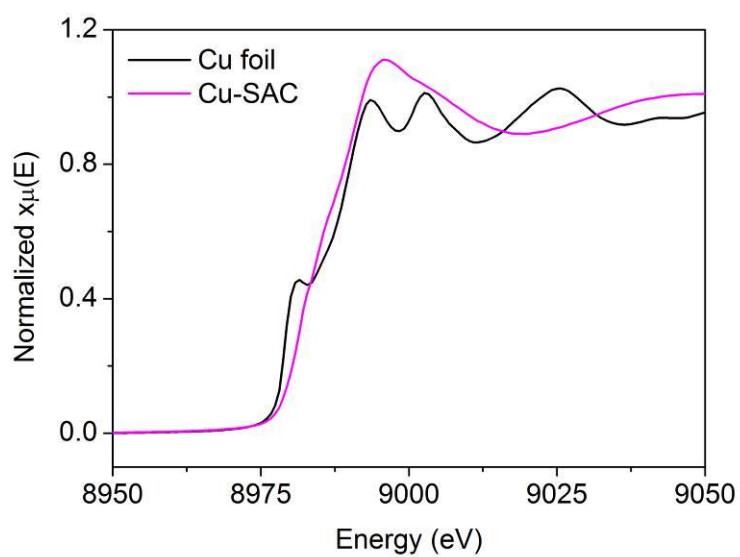

**Supplementary Figure 20 | The oxidation state of Cu in Cu-SAC.** Cu K-edge XANES spectra for Cu-SAC and a copper foil reference.

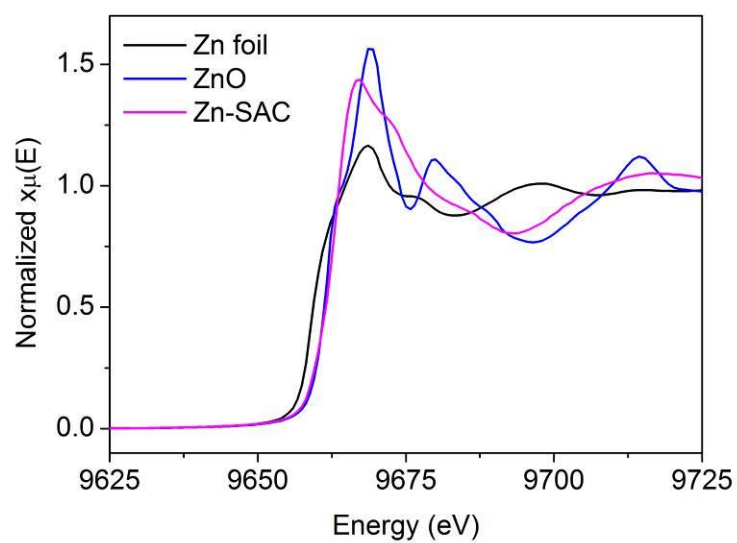

**Supplementary Figure 21 | The oxidation state of Zn in Zn-SAC.** Zn K-edge XANES spectra for Zn-SAC and different zinc reference materials.

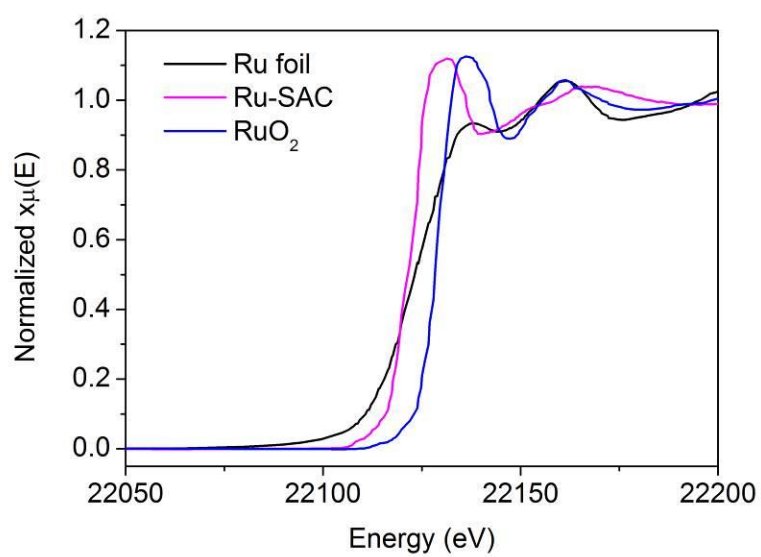

**Supplementary Figure 22 | The oxidation state of Ru in Ru-SAC.** Ru K-edge XANES spectra for Ru-SAC and different ruthenium reference materials.

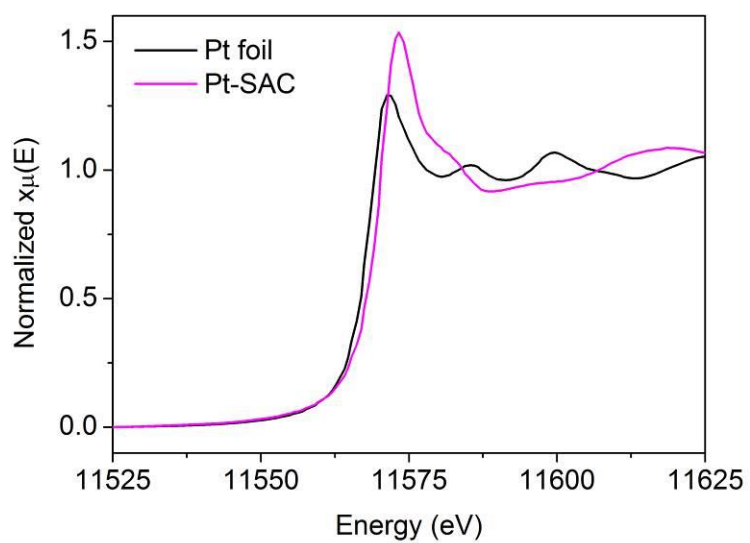

**Supplementary Figure 23 | The oxidation state of Pt in Pt-SAC.** Pt K-edge XANES spectra for Pt-SAC and a platinum foil reference.

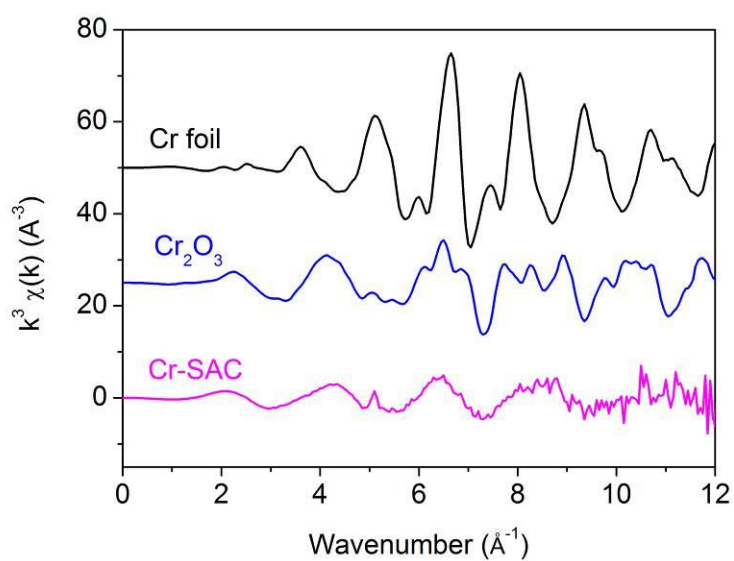

**Supplementary Figure 24 | The structure of Cr-SAC.** Cr K-edge EXAFS (k space plots) for Cr-SAC and different chromium reference materials.

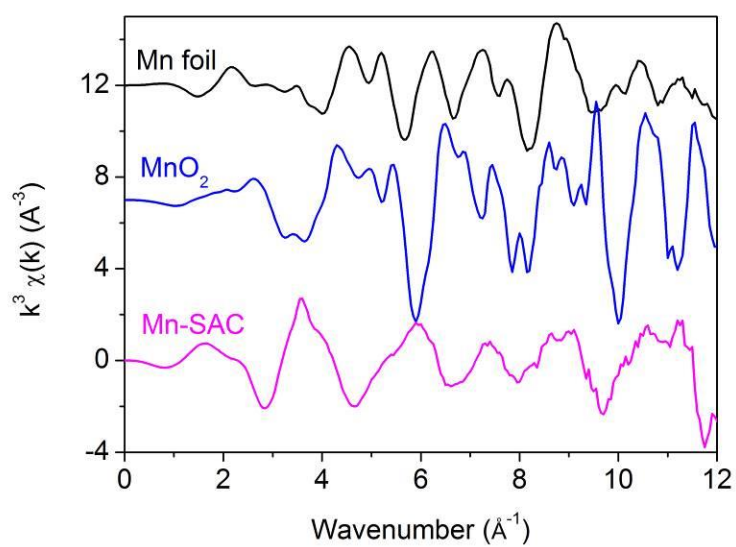

**Supplementary Figure 25 | The structure of Mn-SAC.** Mn K-edge EXAFS (k space plots) for Mn-SAC and a manganese foil reference.

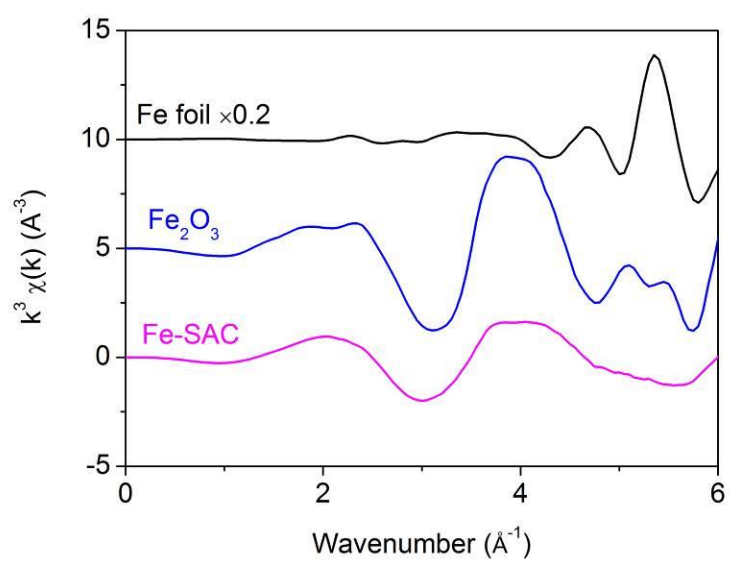

**Supplementary Figure 26 | The structure of Fe-SAC.** Fe K-edge EXAFS (k space plots) for Fe-SAC and different iron reference materials.

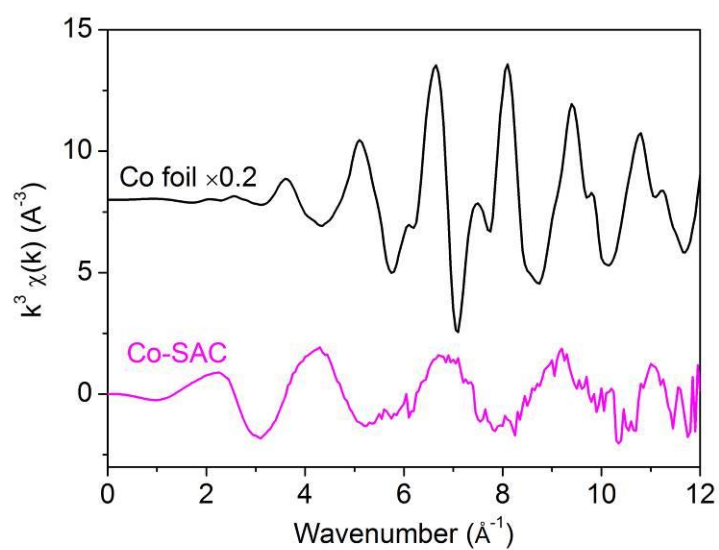

**Supplementary Figure 27 | The structure of Co-SAC.** Co K-edge EXAFS (k space plots) for Co-SAC and a cobalt foil reference.



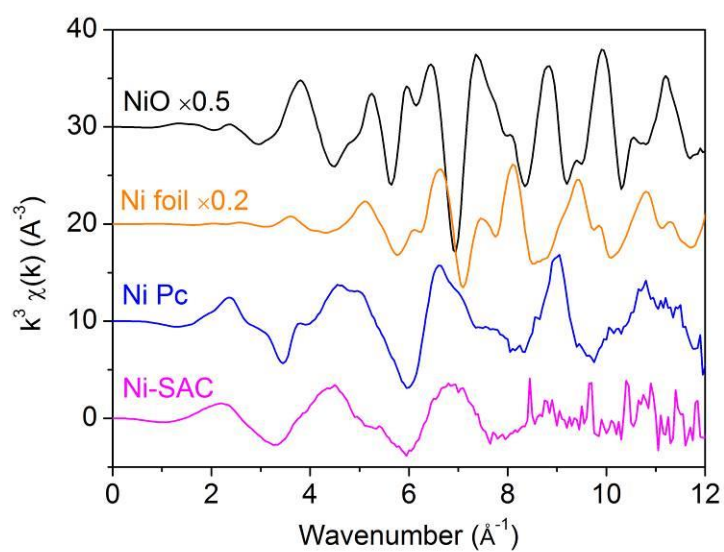

**Supplementary Figure 28 | The structure of Ni-SAC.** Ni K-edge EXAFS (k space plots) for Ni-SAC and different nickel reference materials

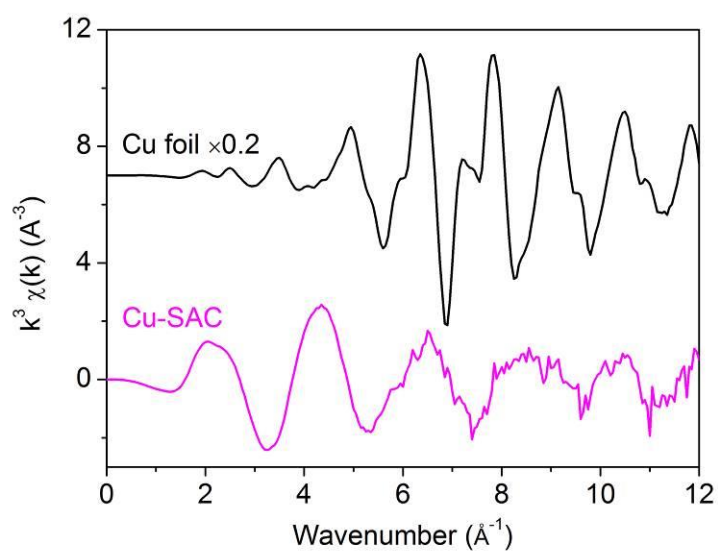

**Supplementary Figure 29 | The structure of Cu-SAC.** Cu K-edge EXAFS (k space plots) for Cu-SAC and a copper foil reference.

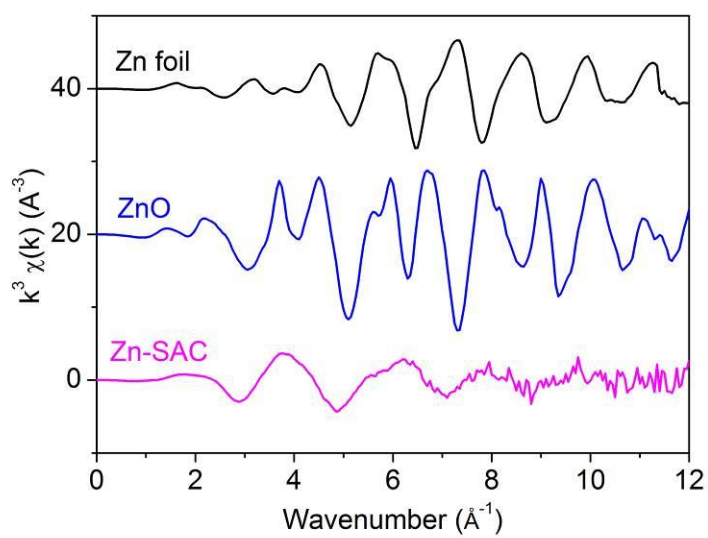

**Supplementary Figure 30 | The structure of Zn-SAC.** Zn K-edge EXAFS (k space plots) for Zn-SAC and different zinc reference materials.

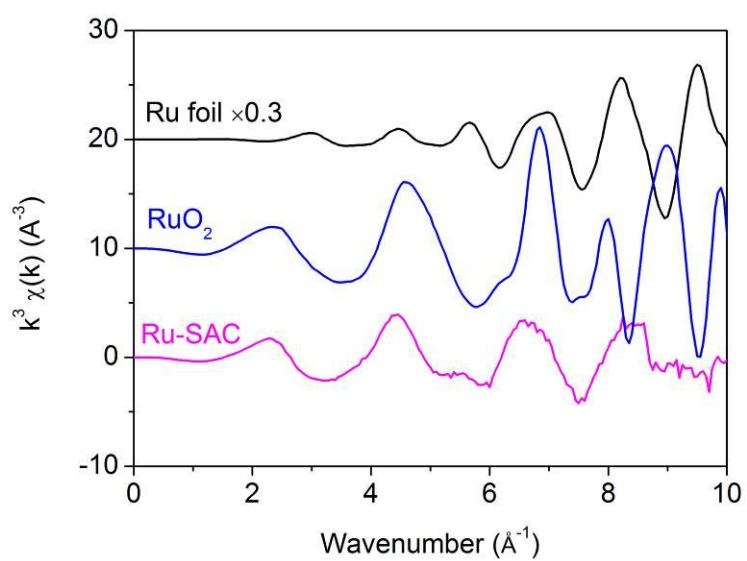

**Supplementary Figure 31 | The structure of Ru-SAC.** Ru K-edge EXAFS (k space plots) for Ru-SAC and different ruthenium reference materials.

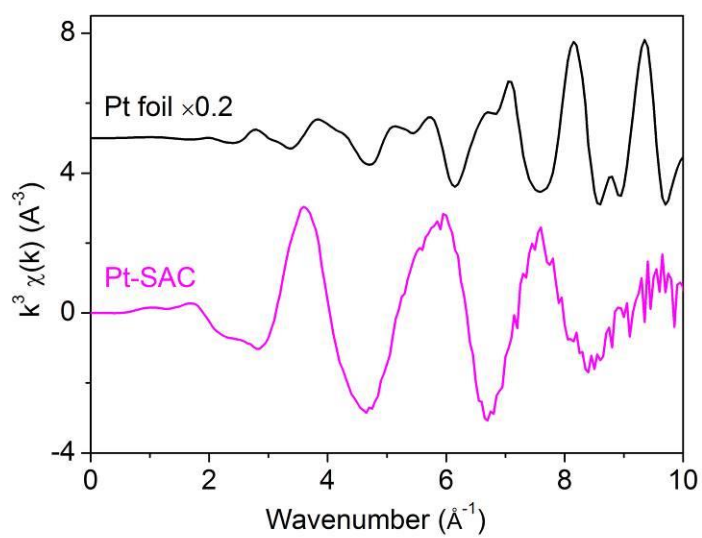

**Supplementary Figure 32 | The structure of Pt-SAC.** Pt K-edge EXAFS (k space plots) for Pt-SAC and a platinum foil reference.

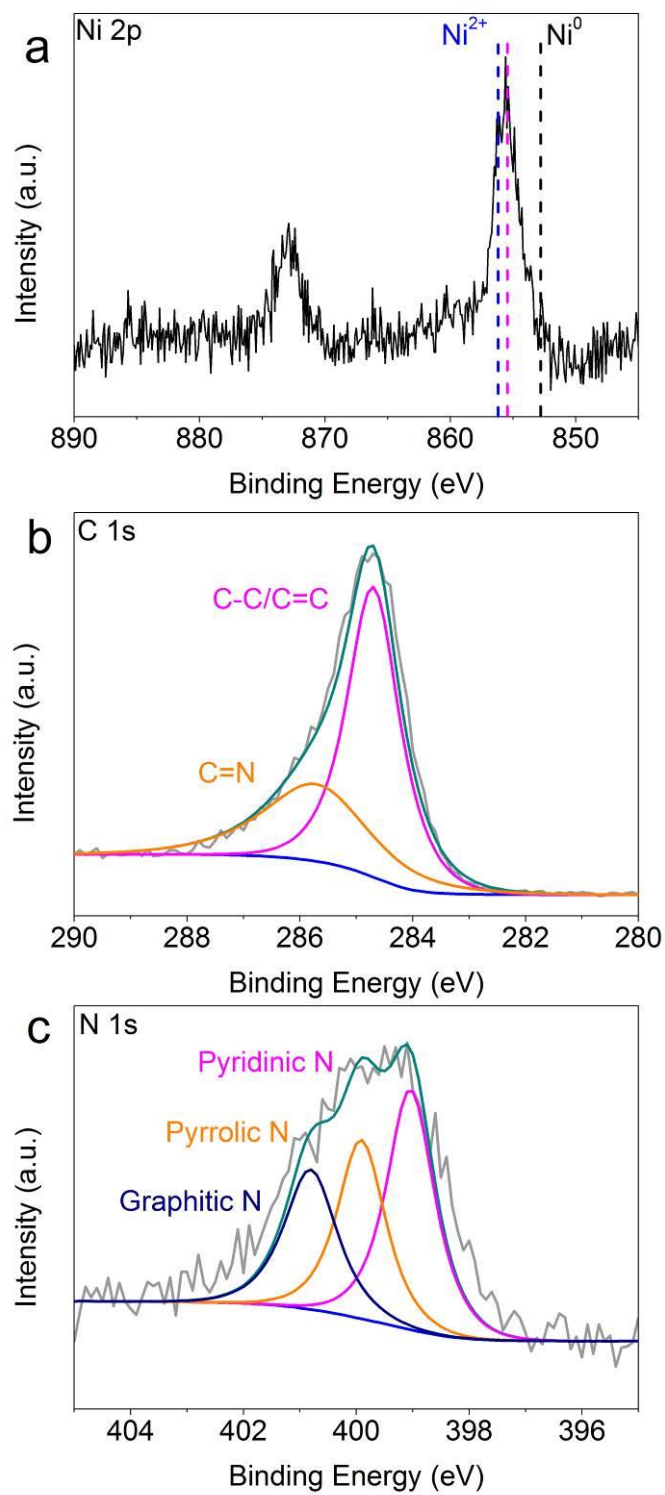

**Supplementary Figure 33 | XPS spectra for Ni-SAC.** a) Ni 2p region; b) C 1s region; c) N 1s region.

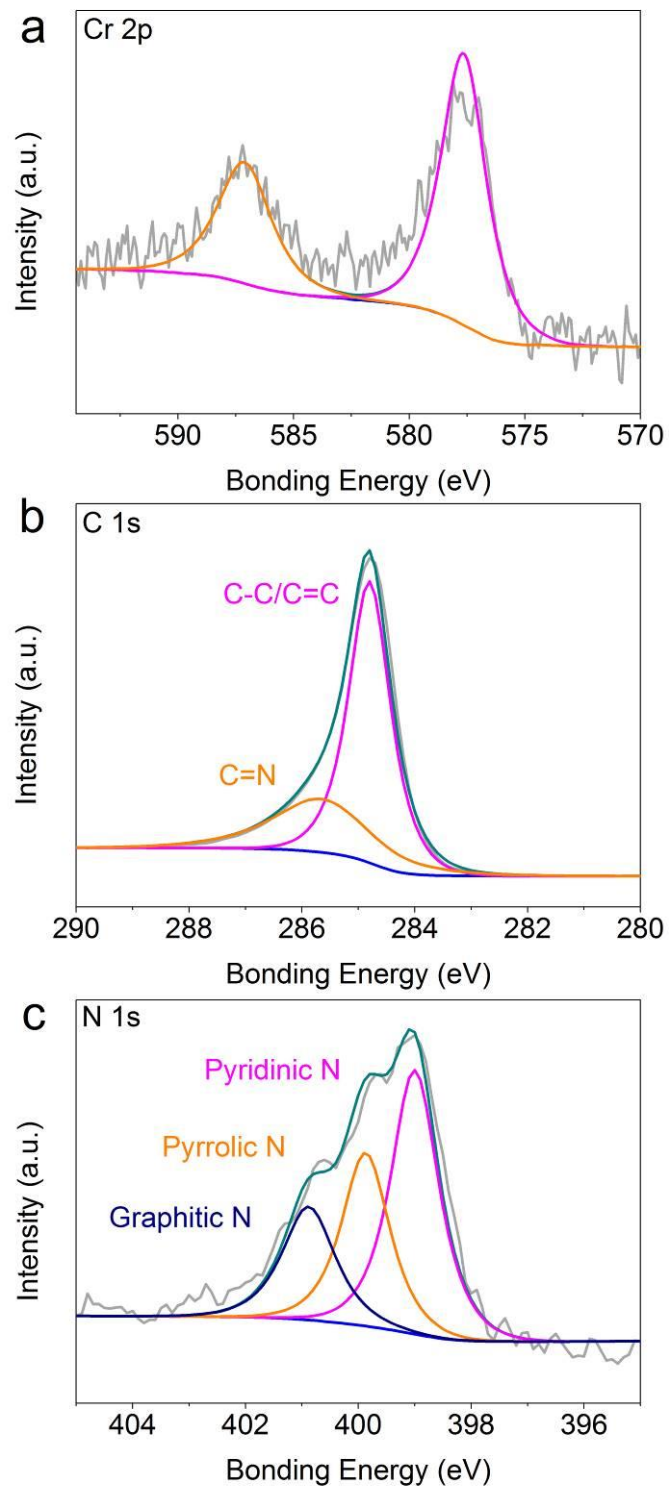

**Supplementary Figure 34 | XPS spectra for Cr-SAC.** a) Cr 2p region; b) C 1s region; c) N 1s region.

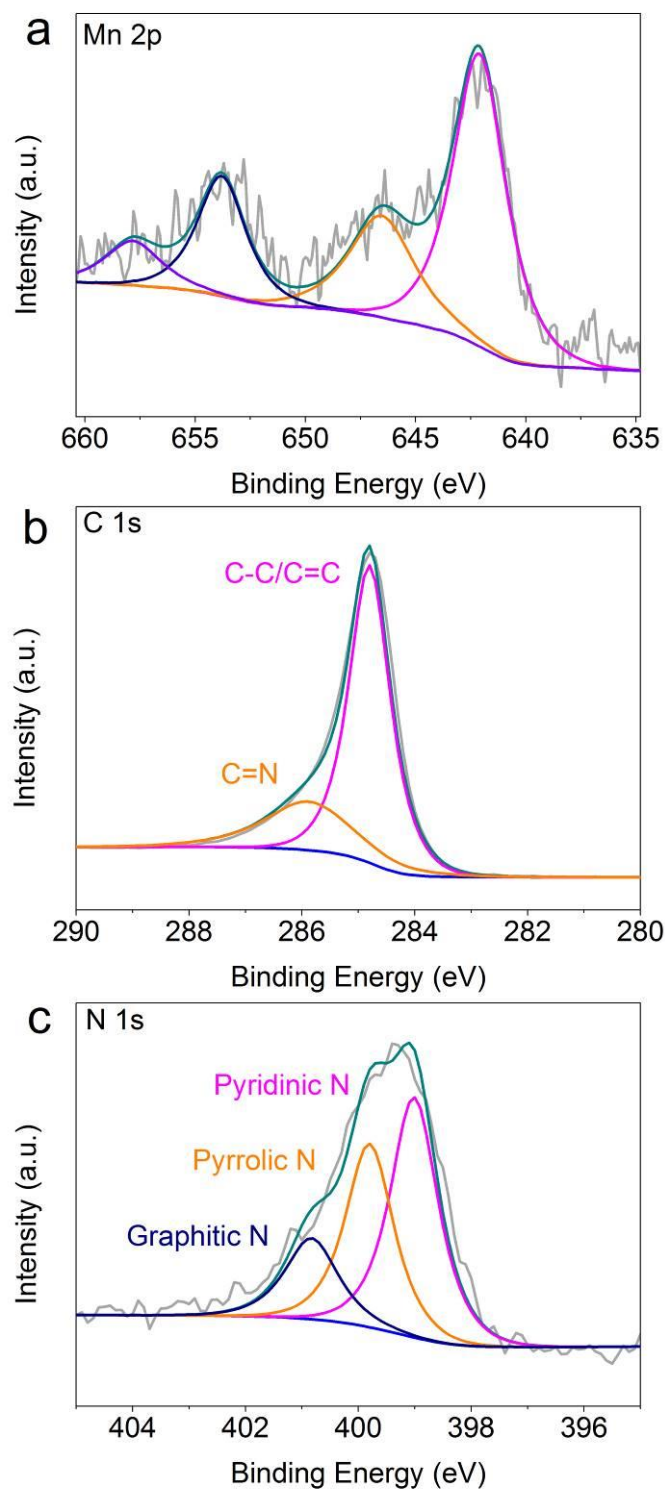

**Supplementary Figure 35 | XPS spectra for Mn-SAC.** a) Mn 2p region; b) C 1s region; c) N 1s region.



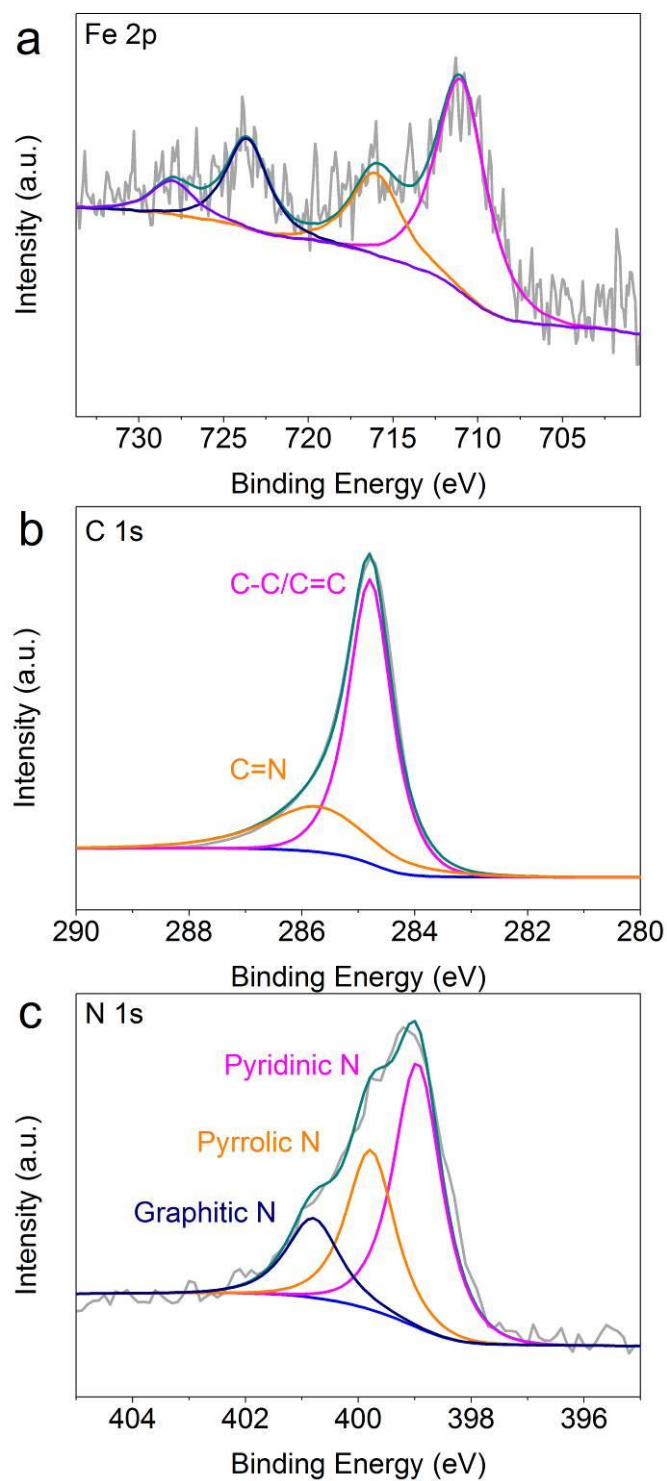

**Supplementary Figure 36 | XPS spectra for Fe-SAC.** a) Fe 2p region; b) C 1s region; c) N 1s region.

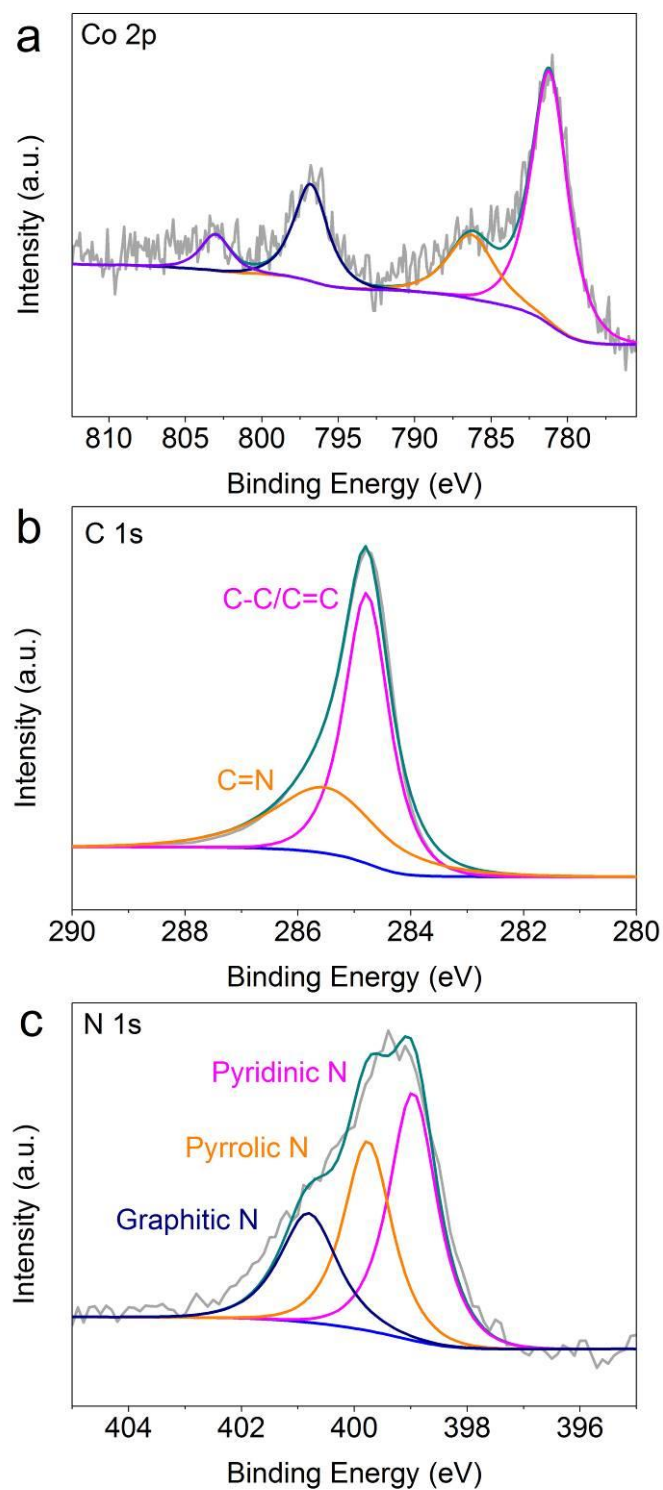

**Supplementary Figure 37 | XPS spectra for Co-SAC.** a) Co 2p region; b) C 1s region; c) N 1s region.

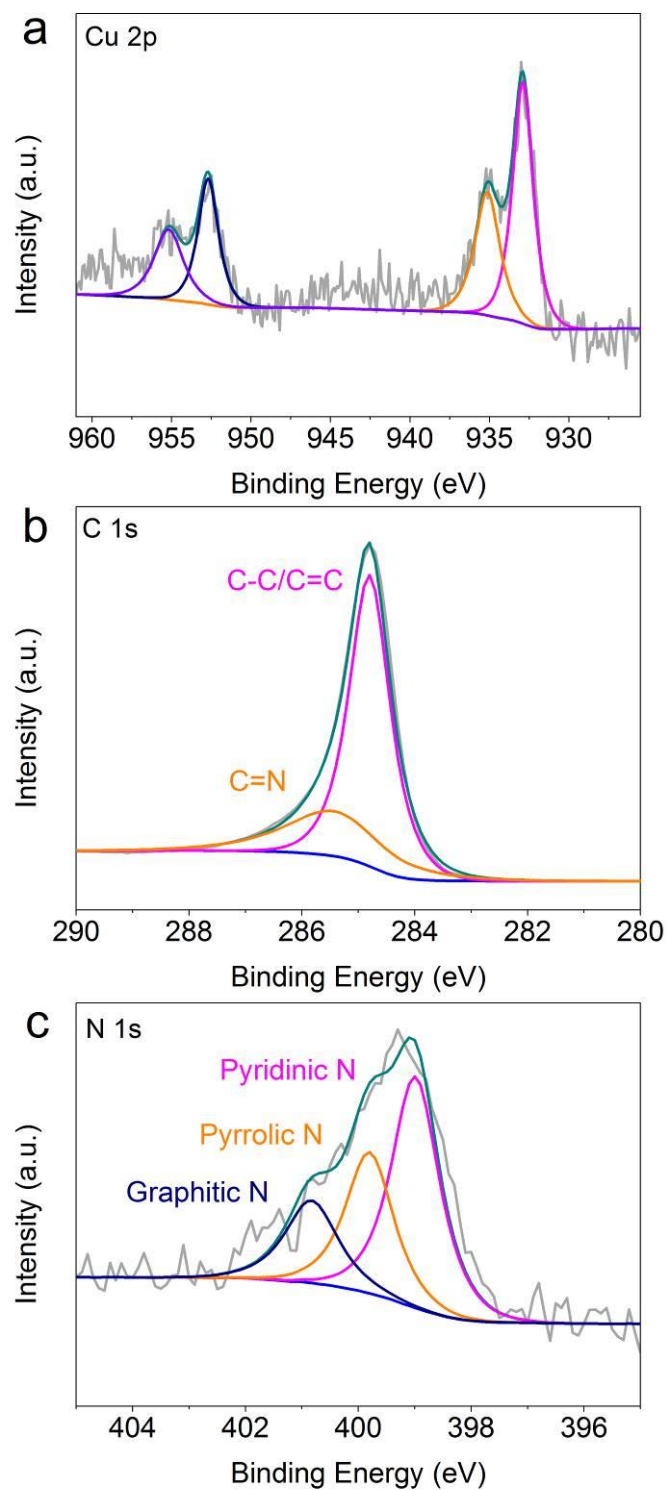

**Supplementary Figure 38 | XPS spectra for Cu-SAC.** a) Cu 2p region; b) C 1s region; c) N 1s region.

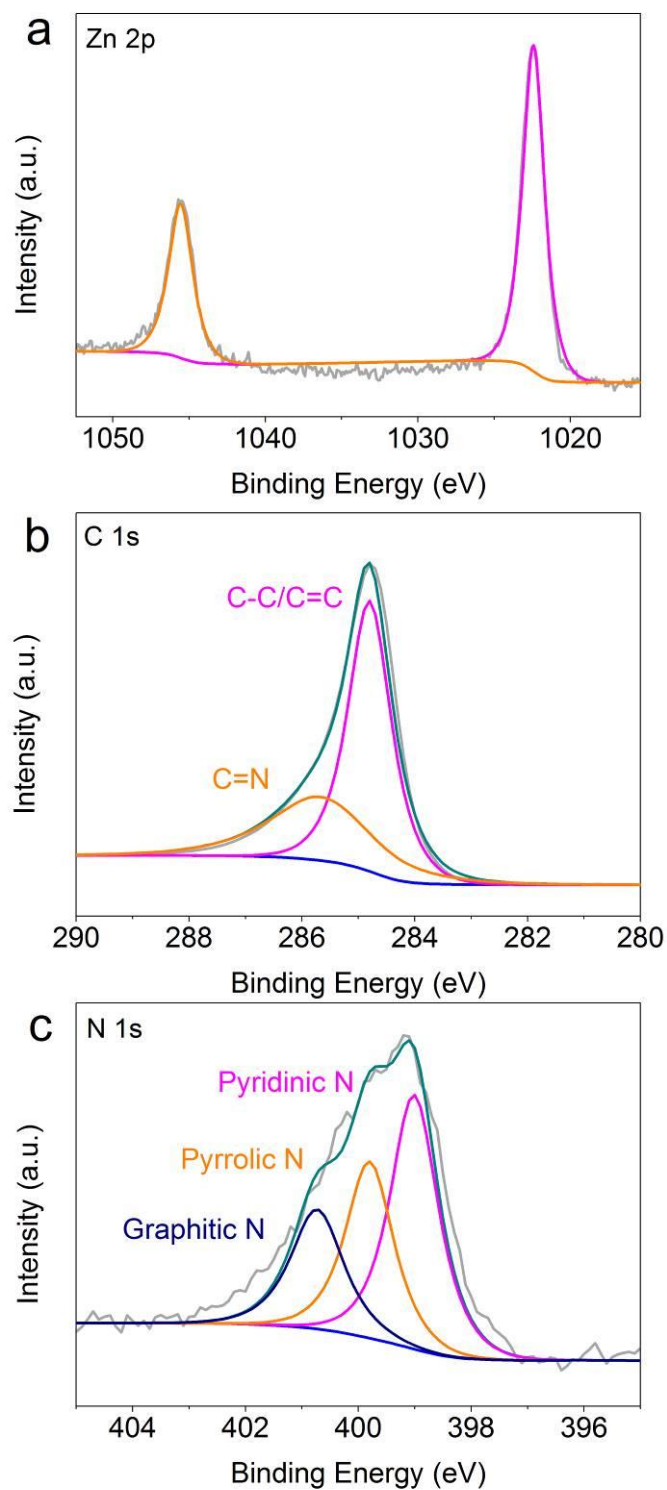

**Supplementary Figure 39 | XPS spectra for Zn-SAC.** a) Zn 2p region; b) C 1s region; c) N 1s region.

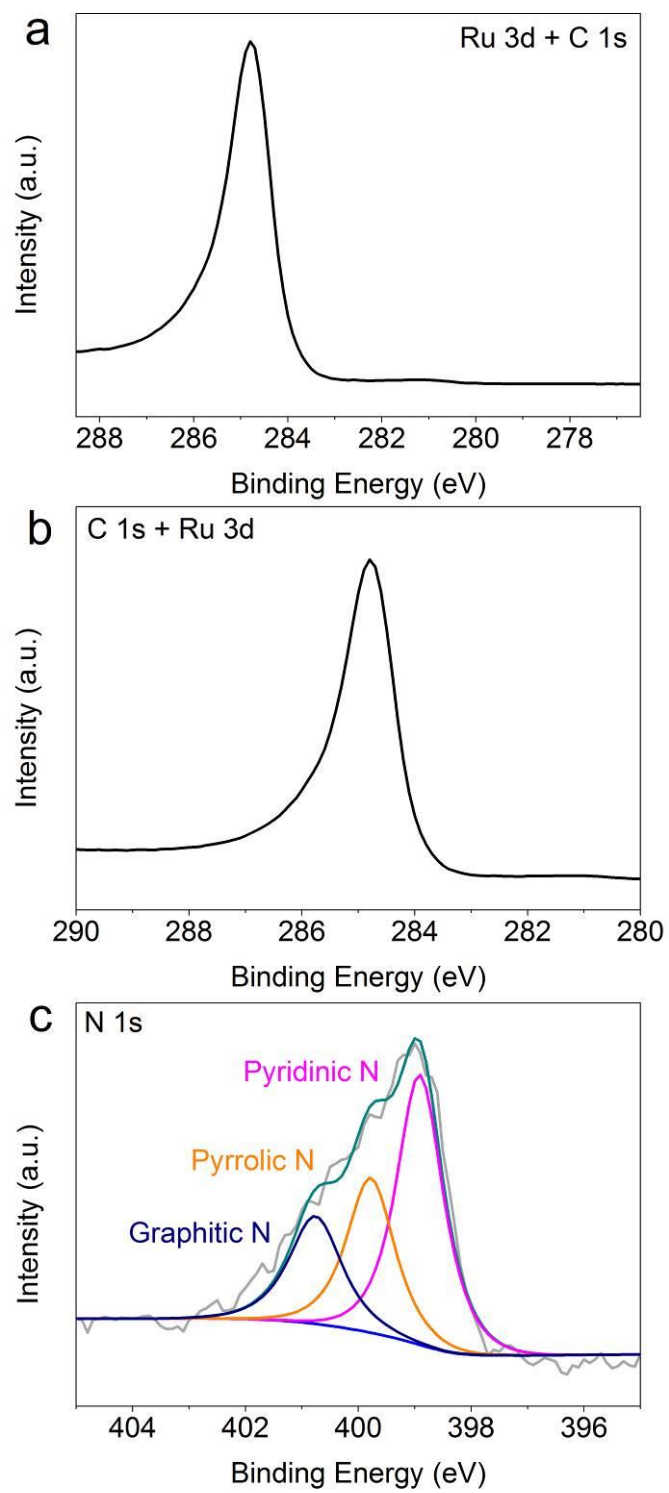

**Supplementary Figure 40 | XPS spectra for Ru-SAC.** a) Ru 3d region; b) C 1s region; c) N 1s region.

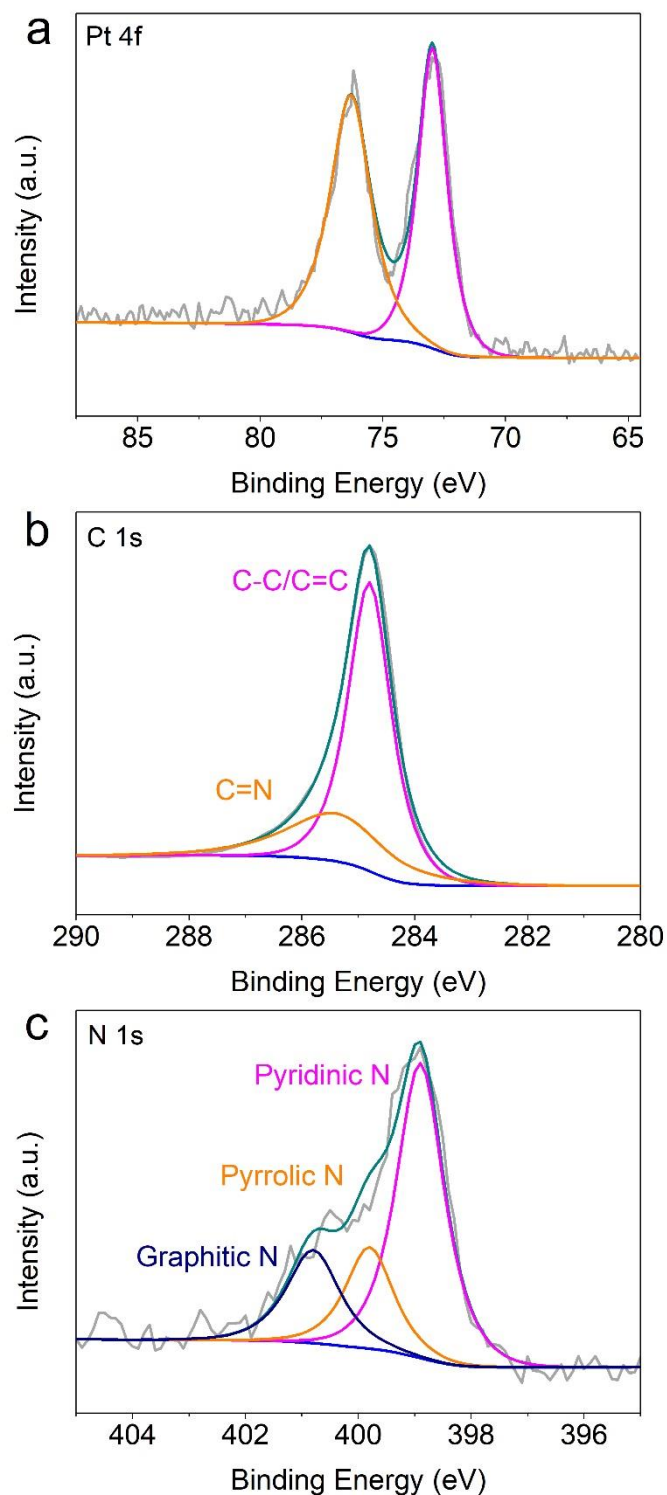

**Supplementary Figure 41 | XPS spectra for Pt-SAC.** a) Pt 4f region; b) C 1s region; c) N 1s region.

Supplementary Figure 33c indicates that the binding energy of the Ni  $2p_{3/2}$  peak was 855.6 eV, higher than that observed for Ni<sup>0</sup> (852.8 eV)<sup>1</sup> and lower than that for Ni<sup>2+</sup> in NiO (856.2 eV).<sup>2</sup> The data suggest the presence of Ni<sup>2+</sup> in the N-SAC, with the lower binding energy reflecting Ni<sup>2+</sup> bonding to less electronegative nitrogen rather than

oxygen. Supplementary Figures 33-41 confirm that all the other M-SACs contain  $M^{2+}$  cations. The C 1s spectra were deconvoluted into neutral carbon (i.e. C-C/C=C) and C-N species. The N 1s spectra were deconvoluted into pyridinic-N, pyrrolic-N, and graphitic-N species.<sup>3</sup>

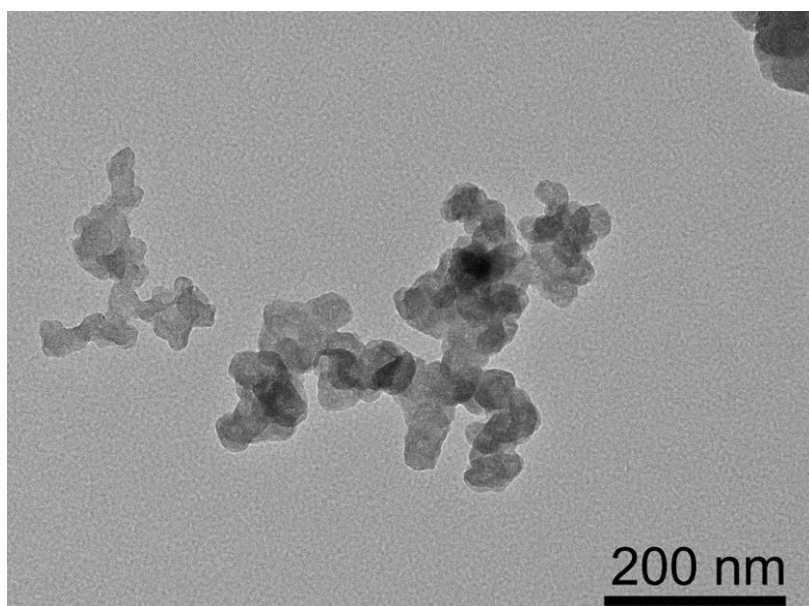

**Supplementary Figure 42 | Morphology of Ni-SAC-2.5.** TEM image of Ni-SAC-2.5.

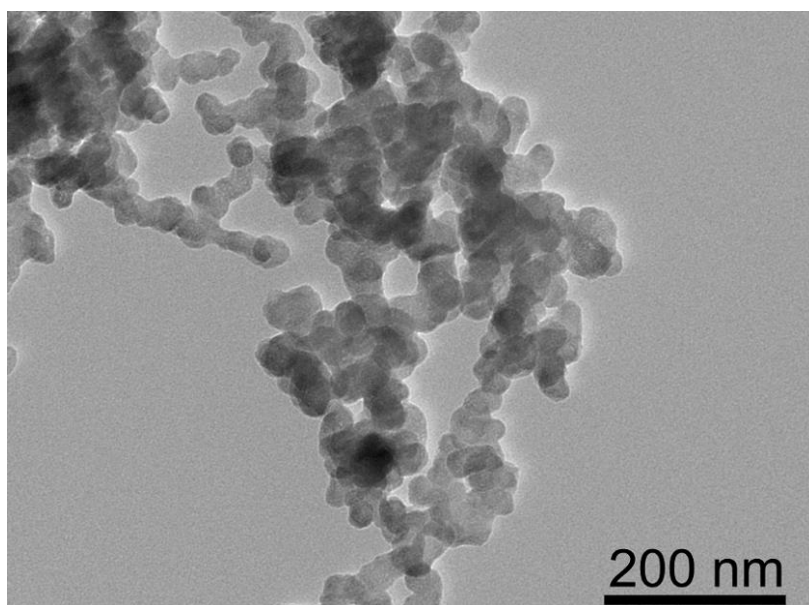

**Supplementary Figure 43 | Morphology of Ni-SAC-3.4.** TEM image of Ni-SAC-3.4.



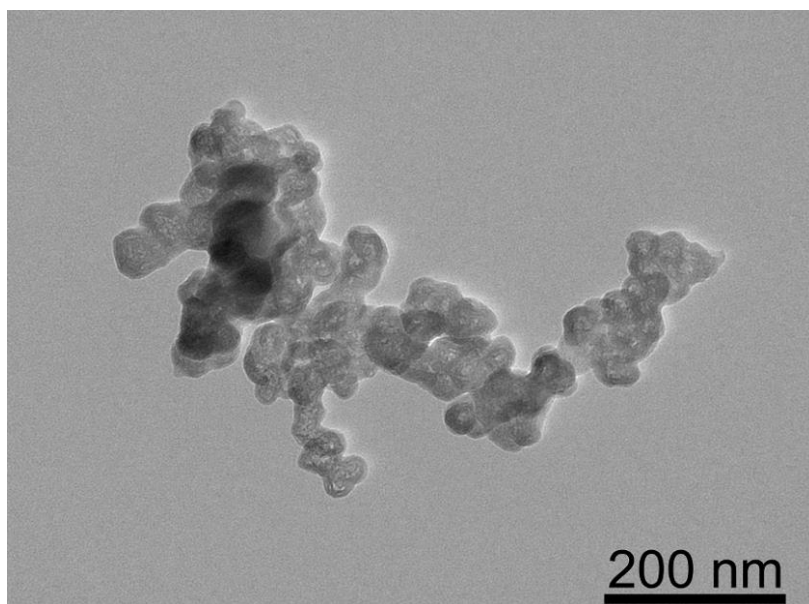

**Supplementary Figure 44 | Morphology of Ni-SAC-4.5.** TEM image of Ni-SAC-4.5.

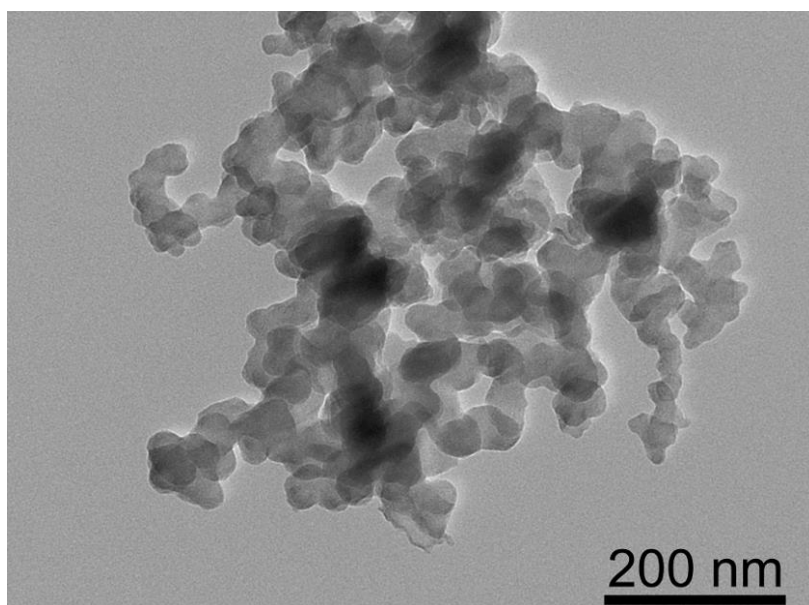

**Supplementary Figure 45 | Morphology of Ni-SAC-5.3.** TEM image of Ni-SAC-5.3.

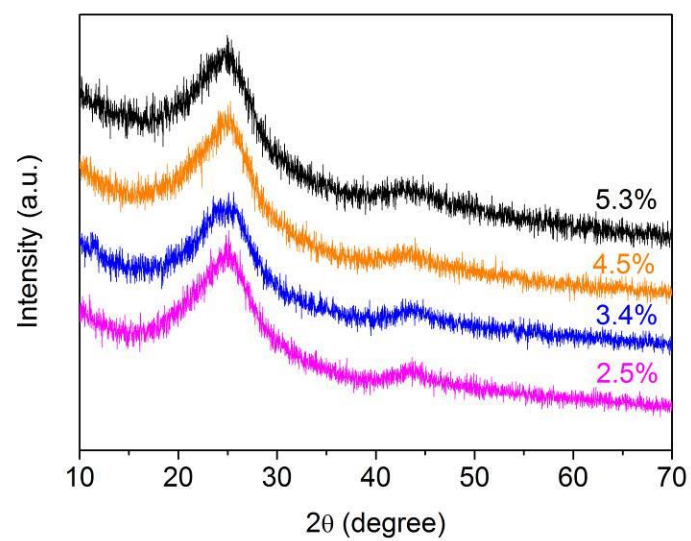

**Supplementary Figure 46 | Characterization of Ni-SACs with different metal loadings.** XRD patterns for Ni-SAC-*x* at different Ni loadings.

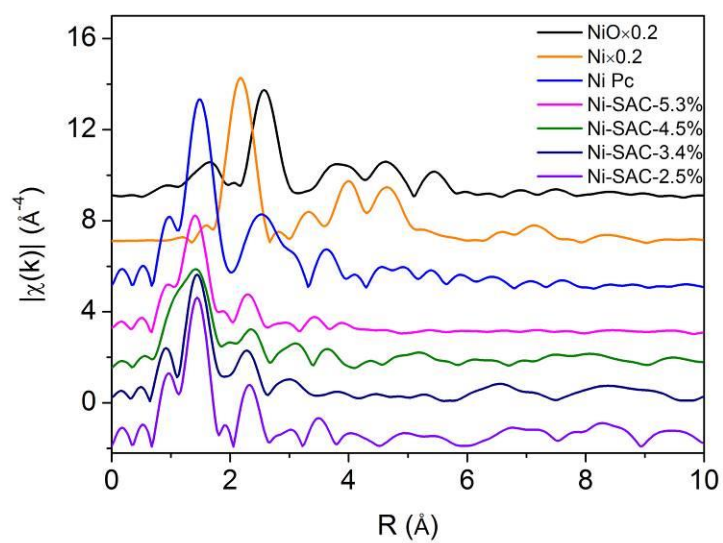

**Supplementary Figure 47 | The structure of Ni-SACs with different metal loadings.**  
Ni K-edge EXAFS (R space plots) for Ni-SAC- $x$  at different Ni loadings.

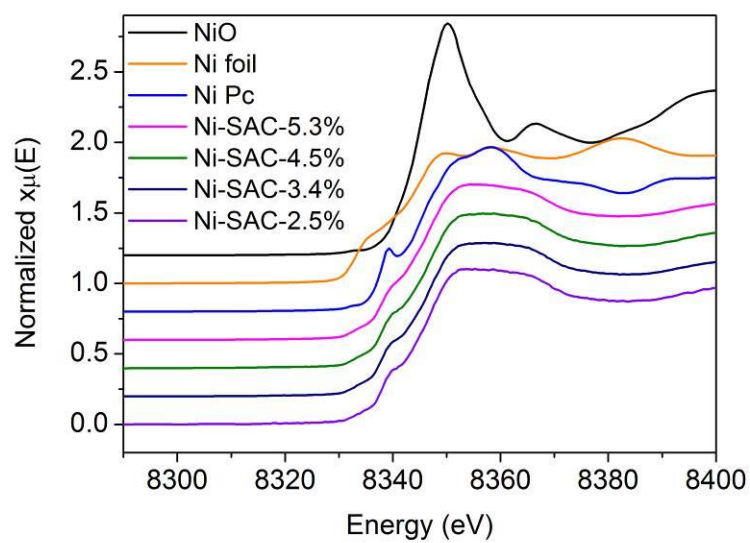

**Supplementary Figure 48 | The oxidation state of Ni in Ni-SACs with different metal loadings.** Ni K-edge XANES spectra for Ni-SAC-*x* with different Ni loadings.

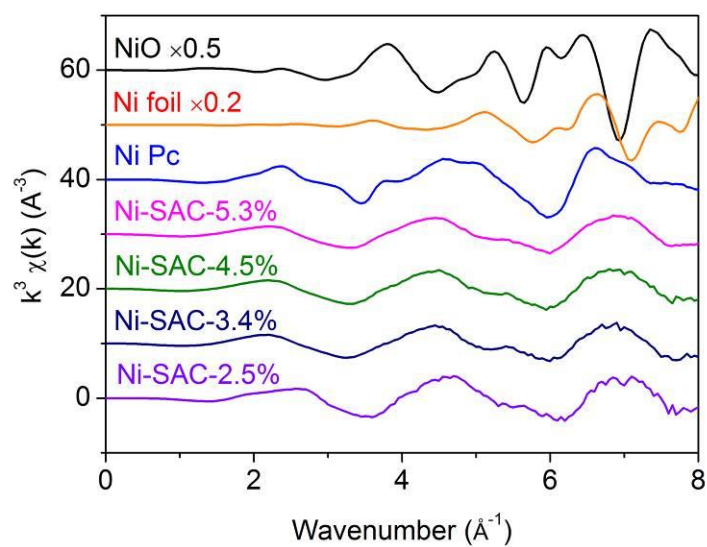

**Supplementary Figure 49 | The structure of Ni-SACs with different metal loadings.** Ni K-edge EXAFS (k space plots) for Ni-SAC- $x$  at different Ni loadings.

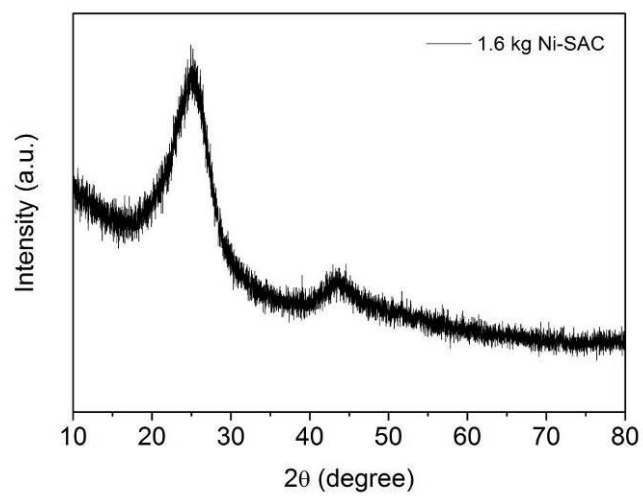

**Supplementary Figure 50 | XRD pattern of Ni-SAC synthesized on a large scale.**

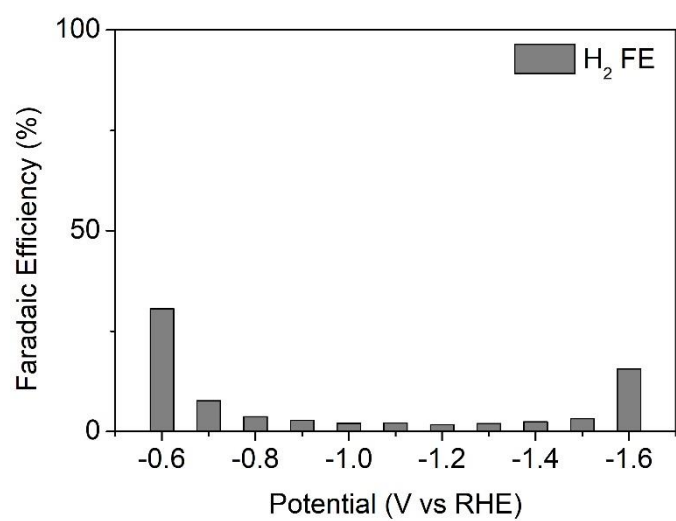

**Supplementary Figure 51 | Faradaic efficiency of H<sub>2</sub> for Ni-SAC-2.5 at different potentials.**

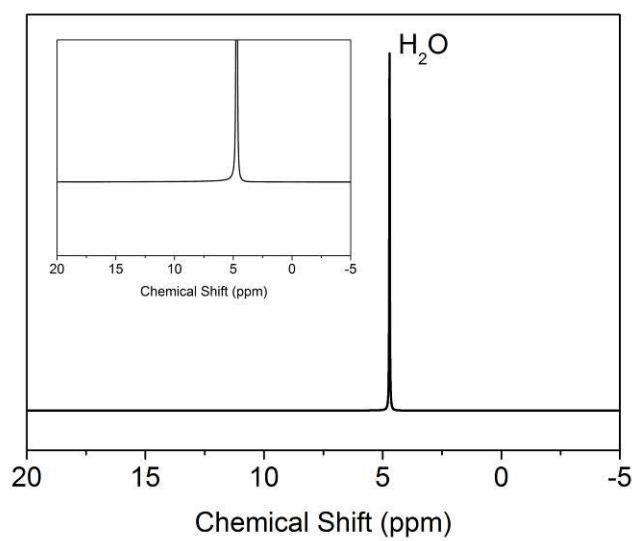

**Supplementary Figure 52 | NMR spectrum of liquid products after  $CO_2RR$ . No liquid products were detected.**



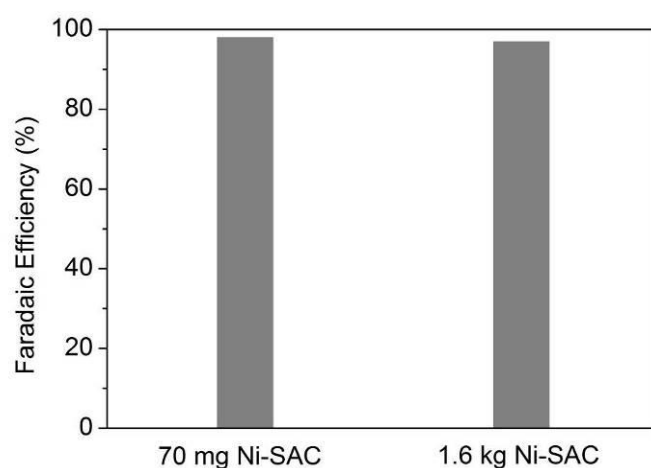

**Supplementary Figure 53 | The CO<sub>2</sub>RR performance of Ni-SAC synthesized on a large scale.** CO<sub>2</sub>RR activity of Ni SACs synthesized on a scale of 70 mg and on a scale of 1.6 kg.

Supplementary Figure 53 confirms that the Ni-SAC synthesized on a large scale (1.6 kg) had a very similar CO<sub>2</sub>RR performance as Ni-SAC synthesized on a 70 mg scale, indicating that the samples were comparable in performance and that the universal M-SAC synthesis route introduced here was highly scalable.<sup>4,5</sup>

**Supplementary Table 1 | Compositional analysis of the different M-SACs.** The metal loading, total N content and N speciation of the different M-SACs is indicated.

| <b>Sample</b> | <b>Metal loading<br/>wt.% (ICP)</b> | <b>Total N content at.%<br/>(XPS)</b> | <b>Pyridinic N content at.%</b> | <b>Pyrolic N content at.%</b> | <b>Graphitic N content at.%</b> |
|---------------|-------------------------------------|---------------------------------------|---------------------------------|-------------------------------|---------------------------------|
| Cr-SAC        | 3.58                                | 3.34                                  | 1.63                            | 1.01                          | 0.70                            |
| Mn-SAC        | 2.30                                | 2.43                                  | 1.14                            | 0.87                          | 0.42                            |
| Fe-SAC        | 1.85                                | 2.32                                  | 1.20                            | 0.72                          | 0.40                            |
| Co-SAC        | 2.97                                | 3.26                                  | 1.42                            | 1.09                          | 0.75                            |
| Ni-SAC        | 5.32                                | 6.75                                  | 3.42                            | 1.93                          | 1.40                            |
| Cu-SAC        | 2.59                                | 3.4                                   | 1.71                            | 0.87                          | 0.82                            |
| Zn-SAC        | 3.65                                | 3.55                                  | 1.61                            | 1.11                          | 0.83                            |
| Ru-SAC        | 2.67                                | 2.12                                  | 1.04                            | 0.61                          | 0.47                            |
| Pt-SAC        | 2.16                                | 1.57                                  | 0.93                            | 0.32                          | 0.32                            |

**Supplementary Table 2 | Metal loading comparison with other reported Ni-SAC materials**

| <b>Sample</b>                          | <b>Metal loading</b> | <b>Measurement method</b> | <b>Reference</b> |
|----------------------------------------|----------------------|---------------------------|------------------|
| Ni-SAC@graphene                        | 0.05 at.%            | ICP                       | 6                |
| Ni-SAC@commercial carbon               | 0.27 wt.%            | ICP                       | 7                |
| Ni-SAC@MOF                             | 0.31 wt.%            | ICP                       | 4                |
| Ni-SAC@g-C <sub>3</sub> N <sub>4</sub> | 1.41 wt.%            | ICP                       | 8                |
| Ni-SAC@MOF                             | 1.53 wt.%            | ICP                       | 5                |
| Ni-SAC@graphene oxide                  | 0.44 at.%            | XPS                       | 9                |
| Ni-SAC@g-C <sub>3</sub> N <sub>4</sub> | 4.6 wt.%             | ICP                       | 10               |
| Ni-SAC@commercial carbon               | 5.32 wt.%            | ICP                       | <b>This work</b> |

## Supplementary References

- 1 Mansour, A. N. Nickel Monochromated Al K $\alpha$  XPS Spectra from the Physical Electronics Model 5400 Spectrometer. *Surf. Sci. Spectra* **3**, 221-230 (1994).
- 2 Mansour, A. N. Characterization of NiO by XPS. *Surf. Sci. Spectra* **3**, 231-238 (1994).
- 3 Cao, Y., Mao, S., Li, M., Chen, Y. & Wang, Y. Metal/Porous Carbon Composites for Heterogeneous Catalysis: Old Catalysts with Improved Performance Promoted by N-Doping. *ACS Catal.* **7**, 8090-8112 (2017).
- 4 Yunteng Qu *et al.* Direct Transformation of Bulk Copper into Copper Single Sites via Emitting and Trapping of Atoms. *Nat. Catal.* **1**, 781-786 (2018).
- 5 Zhao, C. *et al.* Ionic Exchange of Metal-Organic Frameworks to Access Single Nickel Sites for Efficient Electroreduction of CO<sub>2</sub>. *J. Am. Chem. Soc.* **139**, 8078-8081 (2017).
- 6 Fei, H. *et al.* General Synthesis and Definitive Structural Identification of MN<sub>4</sub>C<sub>4</sub> Single-Atom Catalysts with Tunable Electrocatalytic Activities. *Nat. Catal.* **1**, 63-72 (2018).
- 7 Zheng, T. *et al.* Large-Scale and Highly Selective CO<sub>2</sub> Electrocatalytic Reduction on Nickel Single-Atom Catalyst. *Joule* **3**, 265-278 (2019).
- 8 Li, X. *et al.* Exclusive Ni-N<sub>4</sub> Sites Realize Near-Unity CO Selectivity for Electrochemical CO<sub>2</sub> Reduction. *J. Am. Chem. Soc.* **139**, 14889-14892 (2017).
- 9 Jiang, K. *et al.* Isolated Ni Single Atoms in Graphene Nanosheets for High-performance CO<sub>2</sub> Reduction. *Energy Environ. Sci.* **11**, 893-903 (2018).
- 10 Yang, H. B. *et al.* Atomically Dispersed Ni(i) as the Active Site for Electrochemical CO<sub>2</sub> Reduction. *Nat. Energy* **3**, 140-147 (2018).
